# Supplementary material for: Management controls the net greenhouse gas outcomes of growing bioenergy feedstocks on marginally productive croplands
Source: PubMed Central journal article supplement — Sci Adv. 2019 Dec 18;5(12):eaav9318. doi: 10.1126/sciadv.aav9318 (PMC6920018; doi:10.1126/sciadv.aav9318), 2019-12-18
Supplement: aav9318_SM.pdf [file aav9318_SM.pdf]

## Supplementary Materials for

### **Management controls the net greenhouse gas outcomes of growing bioenergy feedstocks on marginally productive croplands**

Virginia L. Jin\*, Marty R. Schmer, Catherine E. Stewart, Robert B. Mitchell, Candiss O. Williams, Brian J. Wienhold, Gary E. Varvel, Ronald F. Follett, John Kimble, Kenneth P. Vogel

\*Corresponding author. Email: virginia.jin@ars.usda.gov

Published 18 December 2019, *Sci. Adv.* **5**, eaav9318 (2019)  
DOI: 10.1126/sciadv.aav9318

#### **This PDF file includes:**

Fig. S1. Total 16-year change in SOC stocks in surface soils (1998–2014).

Fig. S2. Environmental conditions and soil N<sub>2</sub>O emissions for crop years 2012–2017.

Table S1. Annual energy requirements and GHG emissions for off-site agrochemical manufacturing and field agronomic operations.

Table S2. Net GHG outcomes for the agronomic phase of biofuel feedstock production over 16 years of management.

Table S3. Mean daily air temperatures and precipitation inputs (1998–2017) for the growing season (May 1 to October 31) and for crop year (May 1 to April 30).

References (38–40)

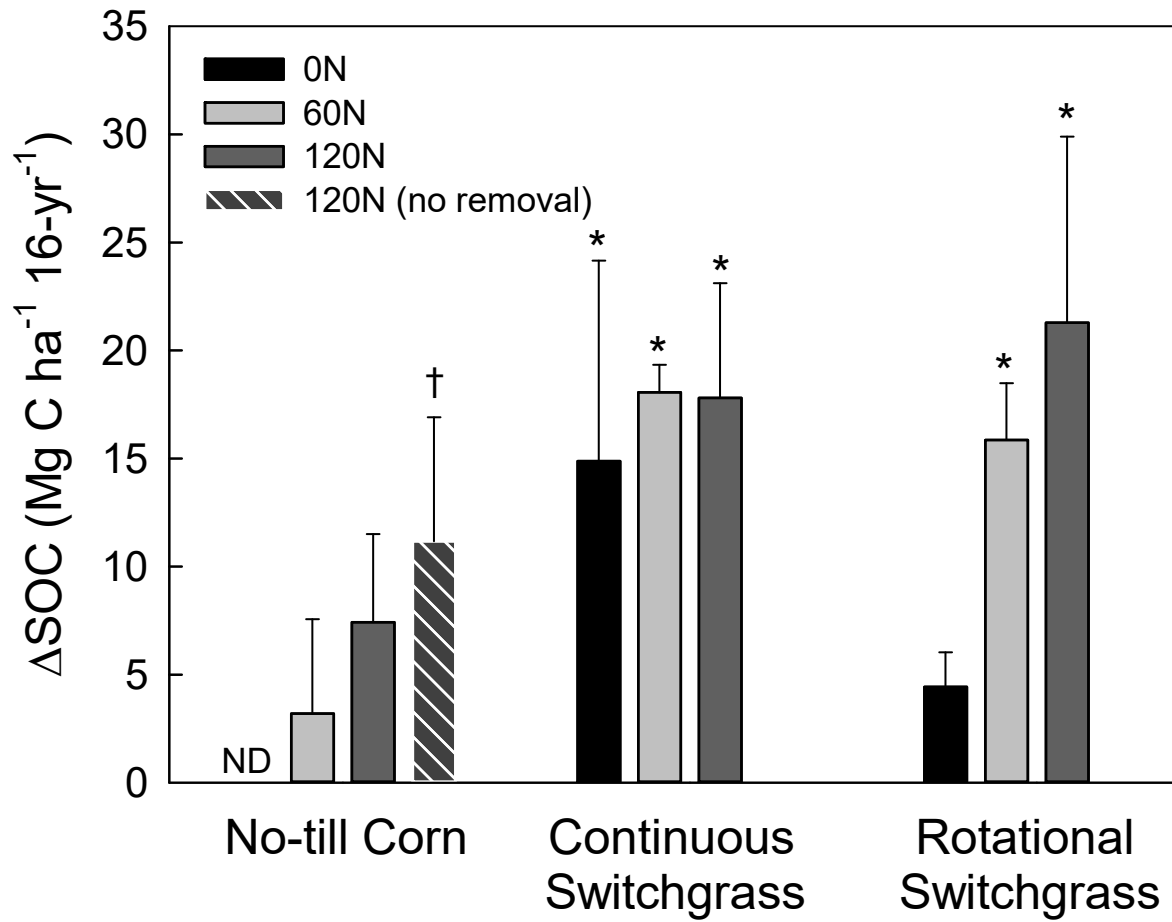

**Fig. S1. Total 16-year change in SOC stocks in surface soils (1998–2014).** Stock changes (mean  $\pm$  se) were calculated on an equivalent soil mass basis approximating the top 30 cm of soil (4133 Mg/ha). Significance from zero indicated by  $^\dagger P \leq 0.10$  and  $^* P \leq 0.05$ .

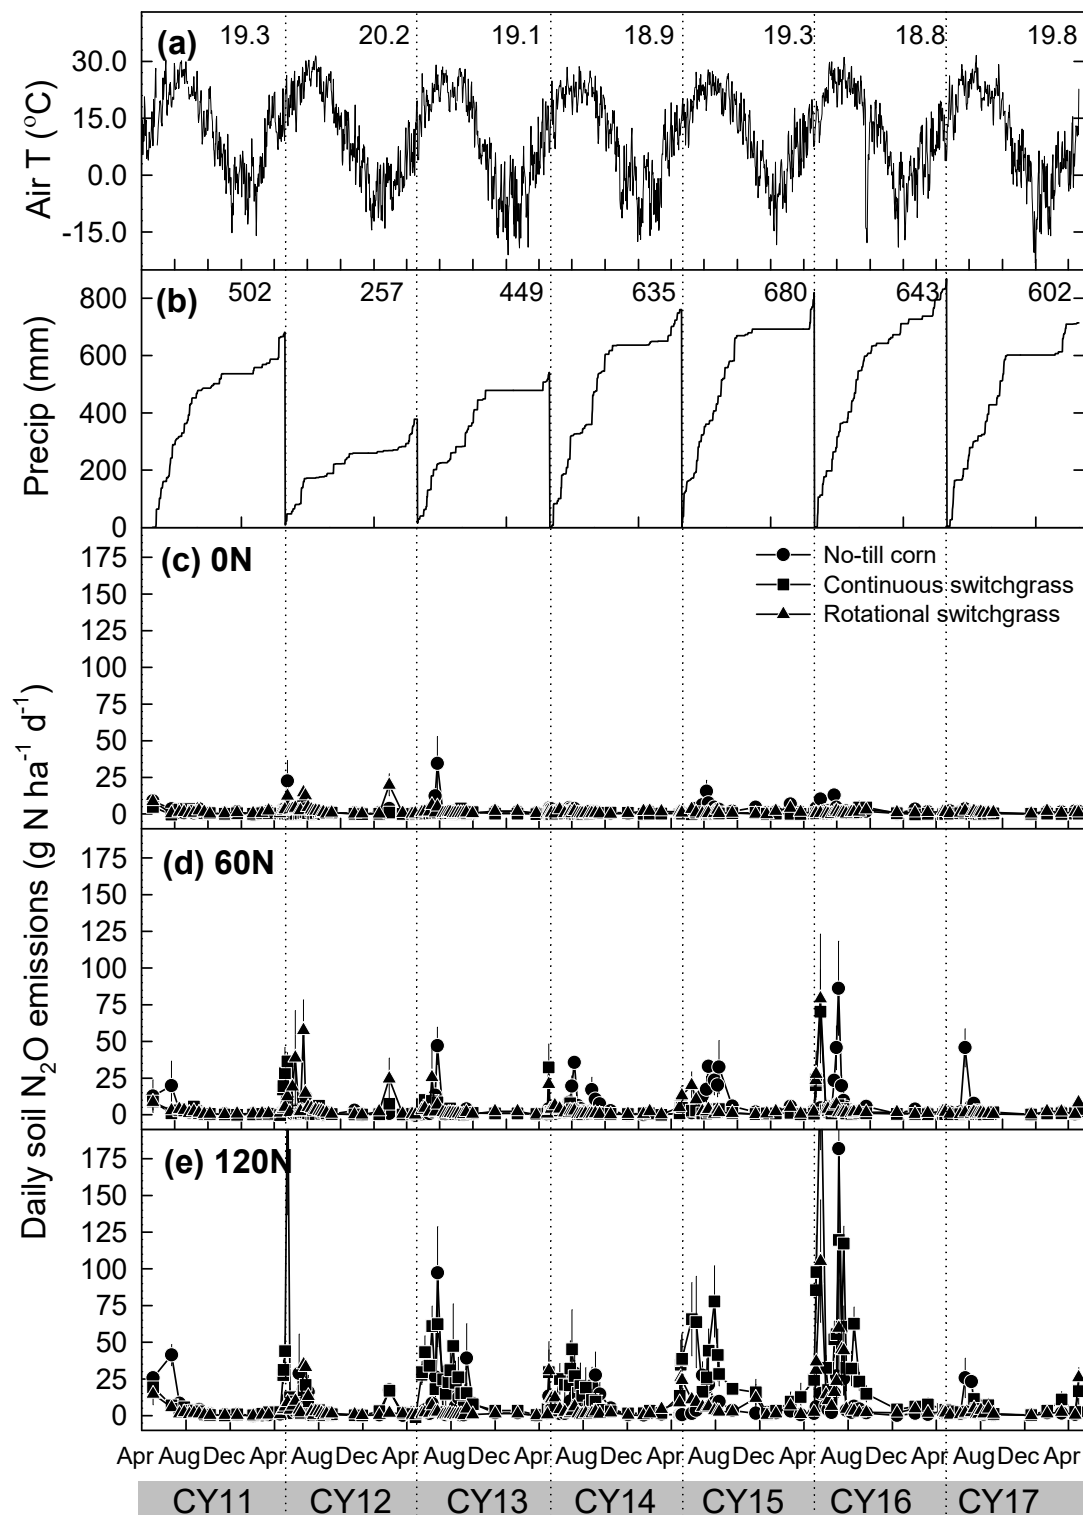

**Fig. S2. Environmental conditions and soil N<sub>2</sub>O emissions for crop years 2012–2017.**

(a) Average daily air temperature, mean growing season temperature shown; (b) Precipitation curve showing total growing season precipitation inputs; and (c-e) daily emissions under 0, 60, and 120 kg N ha<sup>-1</sup> yr<sup>-1</sup>, respectively. Dotted vertical line indicates beginning of each crop-year.

**Table S1. Annual energy requirements and GHG emissions for off-site agrochemical manufacturing and field agronomic operations.**

| Cropping system,<br>agrochemical                       | Timing of<br>operation | Field operation                        | # Events                                                           | Energy <sup>†</sup> | Annual GHG<br>Emissions <sup>‡</sup>                    |
|--------------------------------------------------------|------------------------|----------------------------------------|--------------------------------------------------------------------|---------------------|---------------------------------------------------------|
|                                                        |                        |                                        | # yr <sup>-1</sup>                                                 | GJ ha <sup>-1</sup> | kg CO <sub>2</sub> eq ha <sup>-1</sup> yr <sup>-1</sup> |
| No-till corn                                           | Annually               | Planting                               | 1                                                                  | 0.43                | 44.21                                                   |
|                                                        |                        | Fertilizer application                 | 1                                                                  | 0.06                | 6.17                                                    |
|                                                        |                        | Herbicide application                  | 2                                                                  | 0.10                | 20.56                                                   |
|                                                        |                        | Grain harvest                          | 1                                                                  | 1.28                | 131.61                                                  |
|                                                        |                        | Stover harvest                         | 1                                                                  | 0.34                | 34.96                                                   |
| Switchgrass                                            | Seeding yr             | Herbicide application                  | 1                                                                  | 0.10                | 10.28                                                   |
|                                                        |                        | Drill planting                         | 1                                                                  | 0.33                | 33.93                                                   |
|                                                        |                        | Mowing                                 | 1                                                                  | 0.26                | 26.73                                                   |
|                                                        |                        | Baling                                 | 1                                                                  | 0.33                | 33.93                                                   |
|                                                        | Established            | Fertilizer application                 | 1                                                                  | 0.06                | 6.17                                                    |
|                                                        |                        | Herbicide application <sup>§</sup> 0-1 | 1                                                                  | 0.10                | 10.28                                                   |
|                                                        |                        | Mowing                                 | 1                                                                  | 0.33                | 33.93                                                   |
|                                                        |                        | Baling                                 | 1                                                                  | 0.45                | 46.27                                                   |
|                                                        | Transition             | Planting                               | 1                                                                  | 0.43                | 44.21                                                   |
|                                                        |                        | Herbicide application                  | 2                                                                  | 0.10                | 20.56                                                   |
|                                                        |                        | Grain harvest                          | 1                                                                  | 1.21                | 124.41                                                  |
| Ammonium nitrate <sup>  </sup>                         | 1999-2007              | Broadcast                              | 4.48 kg CO <sub>2</sub> eq kg <sup>-1</sup> N                      |                     |                                                         |
| Urea <sup>  </sup>                                     | 2008-present           | Broadcast                              | 9.18 kg CO <sub>2</sub> eq kg <sup>-1</sup> N                      |                     |                                                         |
| Herbicides <sup>¶</sup>                                | 1998-present           | Commercial sprayer                     | 25.00 kg CO <sub>2</sub> eq kg <sup>-1</sup> AI                    |                     |                                                         |
| N treatment (kg N ha <sup>-1</sup> yr <sup>-1</sup> )  |                        |                                        | 0                                                                  | 60                  | 120                                                     |
| <b>Total emissions from fuel use and manufacturing</b> |                        |                                        | —————kg CO <sub>2</sub> eq ha <sup>-1</sup> yr <sup>-1</sup> ————— |                     |                                                         |
| No-till corn with stover removal                       |                        |                                        | 309.68                                                             | 753.85              | 1191.85                                                 |
| No-till corn with no stover removed                    |                        |                                        | —                                                                  | —                   | 1156.89                                                 |
| Continuous switchgrass                                 |                        |                                        | 118.14                                                             | 534.55              | 945.17                                                  |
| Rotational switchgrass                                 |                        |                                        | 139.98                                                             | 521.25              | 898.27                                                  |

<sup>†</sup>(38); <sup>‡</sup>Diesel, 102.82 kg CO<sub>2</sub> eq GJ<sup>-1</sup> (39); <sup>§</sup>Herbicide applied as needed, not in all years; <sup>||</sup>(40); <sup>¶</sup>(17), per kg active ingredient (AI).

**Table S2. Net GHG outcomes for the agronomic phase of biofuel feedstock production over 16 years of management.** Values in parentheses indicate percent of total gross flux represented by each category. \*"+R" indicates residue retention (0% stover removal).

| System                  | N rate                | Fuel use & manufacturing                                   | Direct emissions | SOC change                | Net GHG ± se |
|-------------------------|-----------------------|------------------------------------------------------------|------------------|---------------------------|--------------|
|                         | kg N ha <sup>-1</sup> | Mg CO <sub>2</sub> eq ha <sup>-1</sup> 16-yr <sup>-1</sup> |                  | (% Total gross emissions) |              |
| No-till continuous corn | 0                     | 6.6 (23%)                                                  | 9.9 (35%)        | -11.7 (42%)               | 4.7 ± 14.7   |
|                         | 60                    | 13.5 (30%)                                                 | 20.1 (44%)       | -11.7 (26%)               | 21.9 ± 16.8  |
|                         | 120                   | 20.3 (25%)                                                 | 32.6 (41%)       | -27.2 (34%)               | 25.7 ± 17.6  |
|                         | 120+R*                | 19.8 (19%)                                                 | 42.1 (41%)       | -40.9 (40%)               | 21.0 ± 26.0  |
| Continuous switchgrass  | 0                     | 1.9 (3%)                                                   | 3.7 (6%)         | -54.5 (91%)               | -48.9 ± 33.6 |
|                         | 60                    | 8.3 (10%)                                                  | 11.9 (14%)       | -66.2 (77%)               | -46.1 ± 4.3  |
|                         | 120                   | 14.6 (10%)                                                 | 68.7 (46%)       | -65.3 (44%)               | 18.0 ± 27.9  |
| Rotational switchgrass  | 0                     | 2.4 (9%)                                                   | 8.4 (31%)        | -16.3 (60%)               | -5.4 ± 5.8   |
|                         | 60                    | 8.3 (10%)                                                  | 17.1 (20%)       | -58.1 (70%)               | -32.8 ± 9.3  |
|                         | 120                   | 14.0 (12%)                                                 | 20.9 (19%)       | -78.0 (69%)               | -43.1 ± 33.0 |

**Table S3. Mean daily air temperatures and precipitation inputs (1998–2017) for the growing season (May 1 to October 31) and for crop year (May 1 to April 30).**

| Year        | Daily air T, °C | Precipitation, mm | Daily air T, °C | Precipitation, mm |
|-------------|-----------------|-------------------|-----------------|-------------------|
|             | Growing season  |                   | Crop-year       |                   |
| 1998        | 20.6            | 601               | 11.6            | 870               |
| 1999        | 19.0            | 483               | 11.4            | 624               |
| 2000        | 20.8            | 425               | 10.0            | 603               |
| 2001        | 19.8            | 494               | 11.3            | 680               |
| 2002        | 19.6            | 423               | 10.6            | 555               |
| 2003        | 18.8            | 337               | 10.1            | 574               |
| 2004        | 18.8            | 360               | 10.5            | 636               |
| 2005        | 20.3            | 386               | 11.6            | 643               |
| 2006        | 19.2            | 435               | 10.4            | 731               |
| 2007        | 20.6            | 645               | 9.9             | 860               |
| 2008        | 19.0            | 765               | 9.9             | 881               |
| 2009        | 17.7            | 549               | 9.0             | 779               |
| 2010        | 19.9            | 661               | 10.1            | 828               |
| <b>Mean</b> | <b>19.6</b>     | <b>505</b>        | <b>10.5</b>     | <b>713</b>        |
| <b>SE</b>   | <b>0.2</b>      | <b>36</b>         | <b>0.2</b>      | <b>33</b>         |
| 2011        | 19.3            | 502               | 11.6            | 681               |
| 2012        | 20.2            | 257               | 10.5            | 377               |
| 2013        | 19.1            | 449               | 9.1             | 541               |
| 2014        | 18.9            | 635               | 10.1            | 761               |
| 2015        | 19.3            | 680               | 11.4            | 820               |
| 2016        | 18.8            | 643               | 11.1            | 868               |
| 2017        | 19.8            | 602               | 10.1            | 714               |
| <b>Mean</b> | <b>19.3</b>     | <b>538</b>        | <b>10.5</b>     | <b>680</b>        |
| <b>SE</b>   | <b>0.2</b>      | <b>56</b>         | <b>0.3</b>      | <b>64</b>         |
